# Supplementary material for: The Ecology of Human Sleep (EcoSleep) Project: Protocol for a longitudinal cohort repeated-measurement-burst study to assess the relationship between sleep determinants and sleep outcomes under real-world conditions across time of year
Source: bioRxiv or medRxiv preprint supplement (doi:10.1101/2024.02.09.24302573), 2024-02-11
Supplement: Supplementary file [file media-1.pdf]

# Supplementary Material

**Title:**

“The Ecology of Human Sleep (EcoSleep) Project: Protocol for a longitudinal cohort repeated-measurement-burst study to assess the relationship between sleep determinants and sleep outcomes under real-world conditions across time of year”

**Authors:**

Anna M Biller [0000-0002-3673-8838]

Nayab Fatima [0009-0006-5856-7642]

Chrysanth Hamberger [0009-0005-1082-3451]

Laura Hainke [0000-0002-8348-5554]

Verena Plankl [0009-0006-2030-7052]

Amna Nadeem [0009-0000-4720-6792]

Achim Kramer [0000-0001-9671-6078]

Martin Hecht [0000-0002-5158-4911]

Manuel Spitschan [0000-0002-8572-9268]

**Contact details corresponding author:**

Dr. Anna M Biller

Email: [anna.biller@tum.de](mailto:anna.biller@tum.de)

| Light exposure variables                                                                      |                     |                                  |                                                                                     |          |                                                 |
|-----------------------------------------------------------------------------------------------|---------------------|----------------------------------|-------------------------------------------------------------------------------------|----------|-------------------------------------------------|
| <b>Nocturnal light exposure</b><br>= average light exposure during the last active 5-h period | L5_light            | Numeric                          | LightLogR [1]                                                                       | ActLumus | Continuously for 3 days/month (30 s resolution) |
| <b>Daytime light exposure</b><br>= average light exposure during the most active 10-h period  | L10_light           | Numeric                          | LightLogR [1]                                                                       | ActLumus | Continuously for 3 days/month (30 s resolution) |
| <b>Time above threshold</b><br>(>XXX lux)                                                     | TAT_XXX             | Numeric (minutes)                | LightLogR [1]                                                                       | ActLumus | Continuously for 3 days/month (30 s resolution) |
| <b>Mean light above threshold</b>                                                             | MLit <sup>xxx</sup> | Numeric (minutes since midnight) | Average clock time of all aggregated data points above XXX lux<br><br>LightLogR [1] | ActLumus | Continuously for 3 days/month (30 s resolution) |
| <b>Melanopic EDI</b>                                                                          | mel_EDI             | Numeric (lux)                    | LightLogR [1]                                                                       | ActLumus | Continuously for 3 days/month (30 s resolution) |

**Supplementary Table 1. Overview of light exposure quantifications.** XXX is a placeholder for the desired threshold, e.g., 500 lux.

## References Supplementary Material

- [1] Zauner, Johannes, Spitschan M. LightLogR: Working With Wearable Light Logger Data. R Package 2023. <https://github.com/tscnlab/LightLogR> (accessed January 17, 2023).
